# Supplementary material
Source: PubMed Central journal article supplement (PMC3366256)
Supplement: NIHMS364680-supplement-01.pdf [file NIHMS364680-supplement-01.pdf]

## SUPPLEMENTAL DATA

### **PPAR $\alpha$ -INDEPENDENT ACTIVATION OF THE SREBP-2 PATHWAY IN NEWBORN PEROXISOME-DEFICIENT *PEX2* KNOCK-OUT MICE**

Werner J. Kovacs<sup>1,2,3</sup>, Khanichi N. Charles<sup>2,7</sup>, Katharina M. Walter<sup>1,3</sup>, Janis E. Shackelford<sup>2</sup>, Thomas M. Wikander<sup>4</sup>, Michael J. Richards<sup>5</sup>, Steven J. Fliesler<sup>5,6</sup>, Skaidrite K. Krisans<sup>2</sup> and Phyllis L. Faust<sup>4</sup>

**Table S1.** Specific activity of HMGCR normalized to HMGCR protein content in the livers of P0 129 control and *Pex2*<sup>-/-</sup> mice

| Genotype | Sp. act.<br>(pmol/min/mg) | Vol. density<br>(per mg of<br>protein) | Sp. act./vol. density<br>(fmol/min) | Normalized average<br>sp. act./vol. density |
|----------|---------------------------|----------------------------------------|-------------------------------------|---------------------------------------------|
| +/+      | 141                       | 224                                    | 631                                 |                                             |
| +/+      | 326                       | 581                                    | 561                                 |                                             |
| +/+      | 215                       | 1064                                   | 202                                 |                                             |
| +/-      | 423                       | 919                                    | 460                                 | 1.0 ± 0.4                                   |
| +/-      | 386                       | 1061                                   | 364                                 |                                             |
| +/-      | 228                       | 744                                    | 306                                 |                                             |
| -/-      | 511                       | 2063                                   | 248                                 |                                             |
| -/-      | 596                       | 2067                                   | 288                                 |                                             |
| -/-      | 401                       | 1958                                   | 205                                 | 0.6 ± 0.1 *                                 |
| -/-      | 718                       | 3589                                   | 200                                 |                                             |

Measurements of HMGCR activities and immunoblots were done on the same liver samples. For Western blot analysis, 200 µg of protein was separated on a SDS-7.5% polyacrylamide gel, transferred to a nitrocellulose membrane, and subjected to immunoblot analysis using a polyclonal anti-HMGCR antibody. \*,  $P = 0.05$  (Student's *t*-test). Sp. act., specific activity.

**Table S2.** Specific activity of IDI1 normalized to IDI1 protein content in the livers of P0 129 control and *Pex2*<sup>-/-</sup> mice

| Genotype | Sp. act.<br>(pmol/min/mg) | Vol. density<br>(per mg of<br>protein) | Sp. act./vol. density<br>(fmol/min) | Normalized average<br>sp. act./vol. density |
|----------|---------------------------|----------------------------------------|-------------------------------------|---------------------------------------------|
| +/+      | 1037                      | 377                                    | 2753                                |                                             |
| +/+      | 1894                      | 696                                    | 2722                                |                                             |
| +/+      | 1706                      | 1004                                   | 1699                                |                                             |
| +/-      | 2551                      | 892                                    | 2860                                | 1.0 ± 0.2                                   |
| +/-      | 2509                      | 790                                    | 3177                                |                                             |
| +/-      | 1778                      | 566                                    | 3142                                |                                             |
| -/-      | 2718                      | 1931                                   | 1408                                |                                             |
| -/-      | 3568                      | 3500                                   | 1019                                |                                             |
| -/-      | 3180                      | 2251                                   | 1413                                | 0.4 ± 0.1 *                                 |
| -/-      | 3002                      | 3572                                   | 840                                 |                                             |

Measurements of IDI1 activities and immunoblots were done on the same liver samples. For Western blot analysis, 200 µg of protein was separated on a SDS-13% polyacrylamide gel, transferred to a nitrocellulose membrane, and subjected to immunoblot analysis using a polyclonal anti-IDI1 antibody. \*,  $P < 0.001$  (Student's *t*-test). Sp. act., specific activity.

**Table S3.** Relative expression of SREBP-regulated genes in the liver of P0 control and *Pex2*<sup>-/-</sup> mice on the 129 and SW/129 genetic background

| Gene     | 129         |                            | SW/129      |                            |
|----------|-------------|----------------------------|-------------|----------------------------|
|          | Control     | <i>Pex2</i> <sup>-/-</sup> | Control     | <i>Pex2</i> <sup>-/-</sup> |
| HMGCR    | 1.00 ± 0.19 | 3.60 ± 1.20 **             | 1.00 ± 0.31 | 4.36 ± 1.54 *              |
| FPPS     | 1.00 ± 0.61 | 2.25 ± 0.99 *              | 1.00 ± 0.25 | 1.97 ± 1.28                |
| SREBP-2  | 1.00 ± 0.20 | 1.62 ± 0.20 ***            | 1.00 ± 0.13 | 2.05 ± 0.58 *              |
| SREBP-1c | 1.00 ± 0.11 | 1.73 ± 0.20 ***            | 1.00 ± 0.31 | 0.39 ± 0.15 *              |
| Insig-1  | 1.00 ± 0.43 | 3.51 ± 1.73 *              | 1.00 ± 0.22 | 2.06 ± 0.97                |
| Insig-2a | 1.00 ± 0.75 | 1.63 ± 0.87                | 1.00 ± 0.53 | 5.19 ± 1.12 **             |

Each value represents the amount of mRNA relative to that in control mice, which was arbitrarily defined as 1. Values are mean ± S.D. from RNA samples of six (129 genetic background) and four (SW/129 genetic background) mice. \*, *P* < 0.05; \*\*, *P* < 0.01; \*\*\*, *P* < 0.001 vs. control mice (Student's *t*-test). Expression data obtained from mice on the SW/129 genetic background are reproduced, with permission, from Kovacs *et al.* [15], © the American Society for Biochemistry and Molecular Biology. [*J. Biol. Chem.* 2009; 284:7232-7245.]

**Table S4.** Relative expression of ER stress markers in the liver of P0 control and *Pex2*<sup>-/-</sup> mice on the 129 and SW/129 genetic background

| Gene               | 129         |                            | SW/129      |                            |
|--------------------|-------------|----------------------------|-------------|----------------------------|
|                    | Control     | <i>Pex2</i> <sup>-/-</sup> | Control     | <i>Pex2</i> <sup>-/-</sup> |
| Herpud1            | 1.00 ± 0.41 | 1.27 ± 0.26                | 1.00 ± 0.14 | 3.54 ± 0.10 ***            |
| GADD45             | 1.00 ± 0.22 | 2.15 ± 0.90 *              | 1.00 ± 0.18 | 0.91 ± 0.06                |
| Grp78              | 1.00 ± 0.10 | 1.22 ± 0.29                | 1.00 ± 0.11 | 0.82 ± 0.30                |
| Grp94              | 1.00 ± 0.13 | 1.02 ± 0.20                | 1.00 ± 0.06 | 0.65 ± 0.21 *              |
| p58 <sup>IPK</sup> | 1.00 ± 0.39 | 0.91 ± 0.21                | 1.00 ± 0.25 | 1.28 ± 0.31                |
| IRE1α              | 1.00 ± 0.24 | 1.62 ± 0.46 *              | 1.00 ± 0.26 | 2.15 ± 0.20 ***            |
| p8                 | 1.00 ± 0.22 | 7.40 ± 3.43 **             | 1.00 ± 0.34 | 11.18 ± 2.63 ***           |
| ATF4               | 1.00 ± 0.08 | 1.62 ± 0.25 ***            | 1.00 ± 0.26 | 1.32 ± 0.29                |
| CHOP               | 1.00 ± 0.28 | 1.10 ± 0.32                | 1.00 ± 0.23 | 1.67 ± 0.31 *              |
| ATF3               | 1.00 ± 0.84 | 9.58 ± 8.99 *              | 1.00 ± 0.04 | 15.70 ± 8.52 *             |
| TRIB3              | 1.00 ± 0.32 | 4.33 ± 1.69 **             | 1.00 ± 0.27 | 9.77 ± 3.97 **             |

Each value represents the amount of mRNA relative to that in control mice, which was arbitrarily defined as 1. Values are mean ± S.D. from RNA samples of six (129 genetic background) and four (SW/129 genetic background) mice. \*, *P* < 0.05; \*\*, *P* < 0.01; \*\*\*, *P* < 0.001 vs. control mice (Student's *t*-test). Expression data obtained from mice on the SW/129 genetic background are reproduced, with permission, from Kovacs *et al.* [15], © the American Society for Biochemistry and Molecular Biology. [*J. Biol. Chem.* 2009; 284:7232-7245.]
